# Supplementary material
Source: Springer Nature journal article supplement (https://www.springermedizin.de/resource/supplementary/13054_2010_8822_MOESM5_ESM.pdf/9732650)

**EVLW<sub>2</sub> (ml)**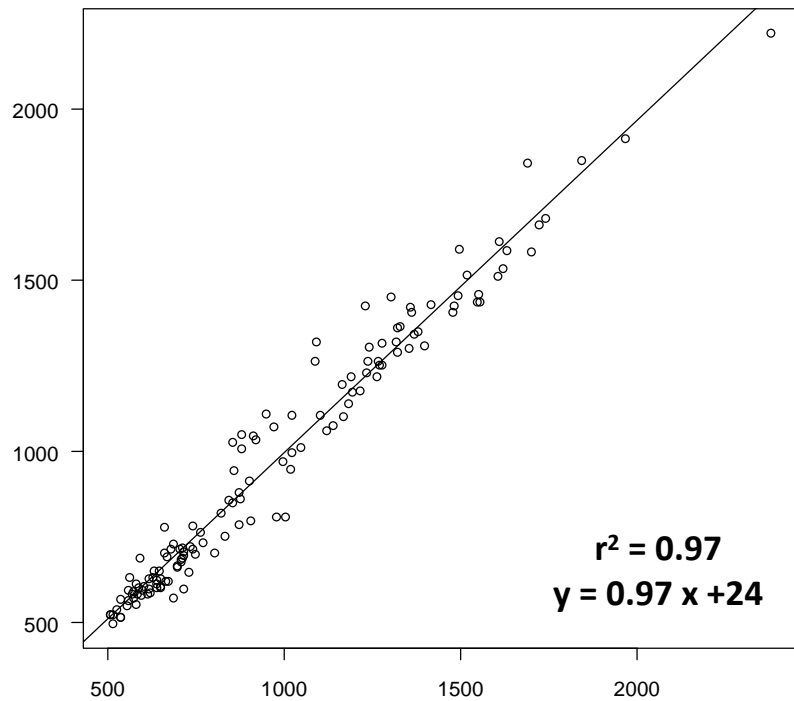**EVLW<sub>1</sub> (ml)****EVLW<sub>2</sub> - EVLW<sub>1</sub> (ml)**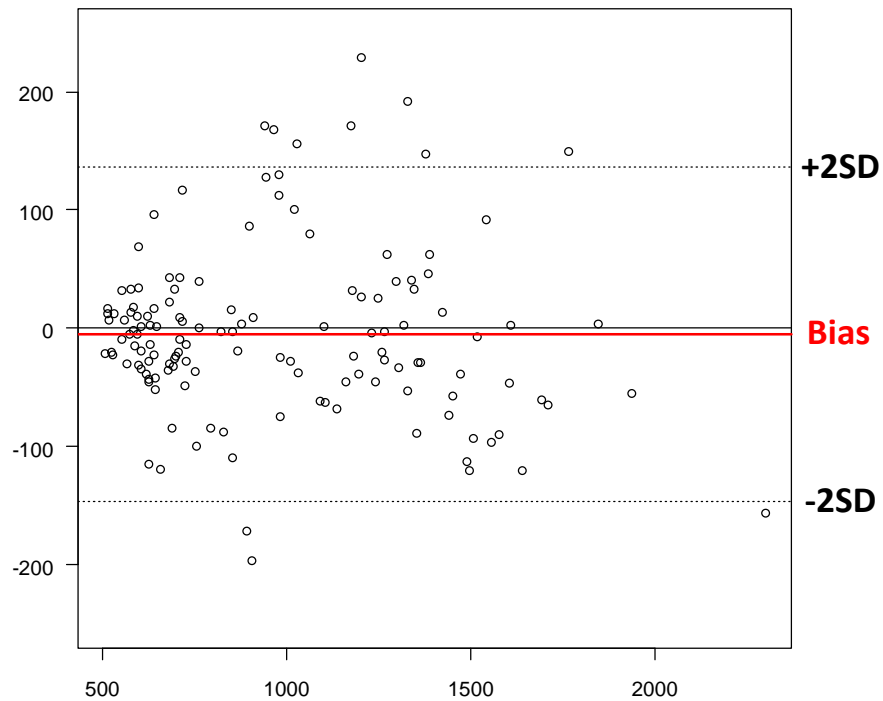**Average EVLW<sub>1</sub> & EVLW<sub>2</sub> (ml)**

Supplement: MOESM5 [file 9732650]
